# Supplementary material for: Highly bioactive triple-helical nano collagens for accelerated treatment of photodamaged skin
Source: Royal Society of Chemistry journal article supplement (doi:10.1039/d4bm00860j), 2024-01-01
Supplement: d4bm00860j1.pdf [file d4bm00860j1.pdf]

## Supplementary Information

### Highly bioactive triple-helical nano collagens for accelerated treatment of photodamaged skin

Shuangni Shi<sup>a, c</sup>, Siqi Quan<sup>a, c</sup>, Jingting Zhang<sup>a, c</sup>, Biyang Ling<sup>a, c</sup>, Linyan Yao<sup>\*a, b, c</sup>, and Jianxi Xiao<sup>\*a, c</sup>

- a. State Key Laboratory of Applied Organic Chemistry, College of Chemistry and Chemical Engineering, Lanzhou University, Lanzhou 730000, P. R. China. E-mail: [lyyao@lzu.edu.cn](mailto:lyyao@lzu.edu.cn); [xiaojsx@lzu.edu.cn](mailto:xiaojsx@lzu.edu.cn)
- b. School of Life Science, Lanzhou University, Lanzhou 730000, P. R. China.
- c. Gansu Engineering Research Center of Medical Collagen, Lanzhou 730000, P. R. China.

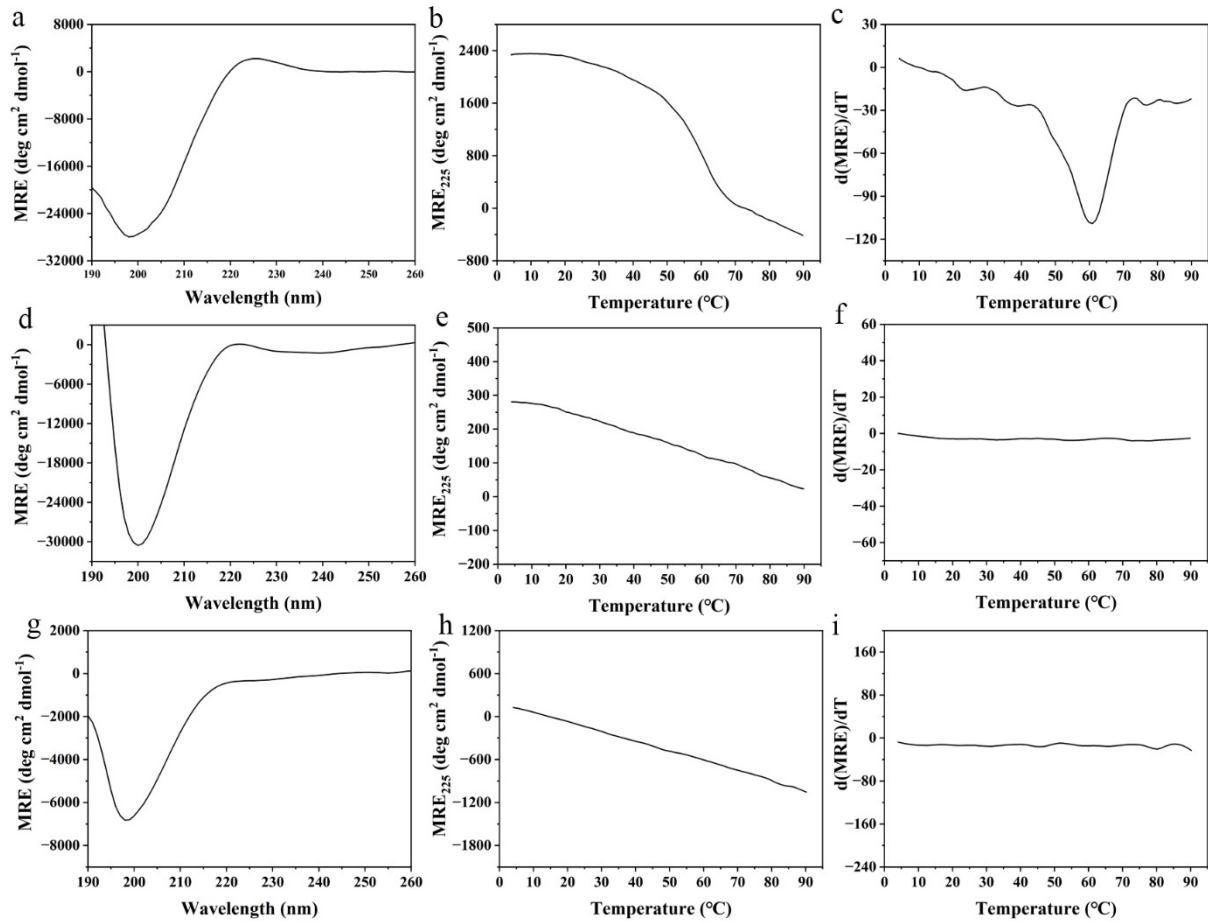

**Fig. S1** The thermal stability characterization of STP (a-c), SMP (d-f) and HCP (g-i). CD spectra (a, d, g), CD thermal unfolding (b, e, h) and the first derivative ( $d(\text{MRE})/dT$ ) of the thermal unfolding curves (c, f, i).

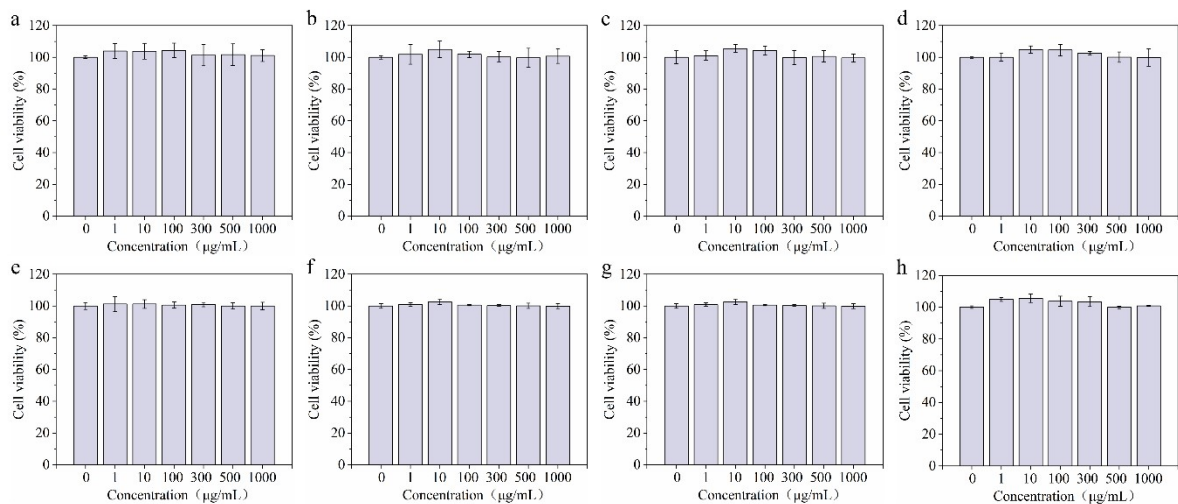

**Fig. S2** In vitro cytotoxicity of NC-1 (a), NC-2 (b), NC-3 (c), NC-4 (d), SMP (e), STP (f), HCP (g) and Col (h) groups at various concentration (0, 1, 10, 100, 300, 500 and 1000  $\mu\text{g/mL}$ ).

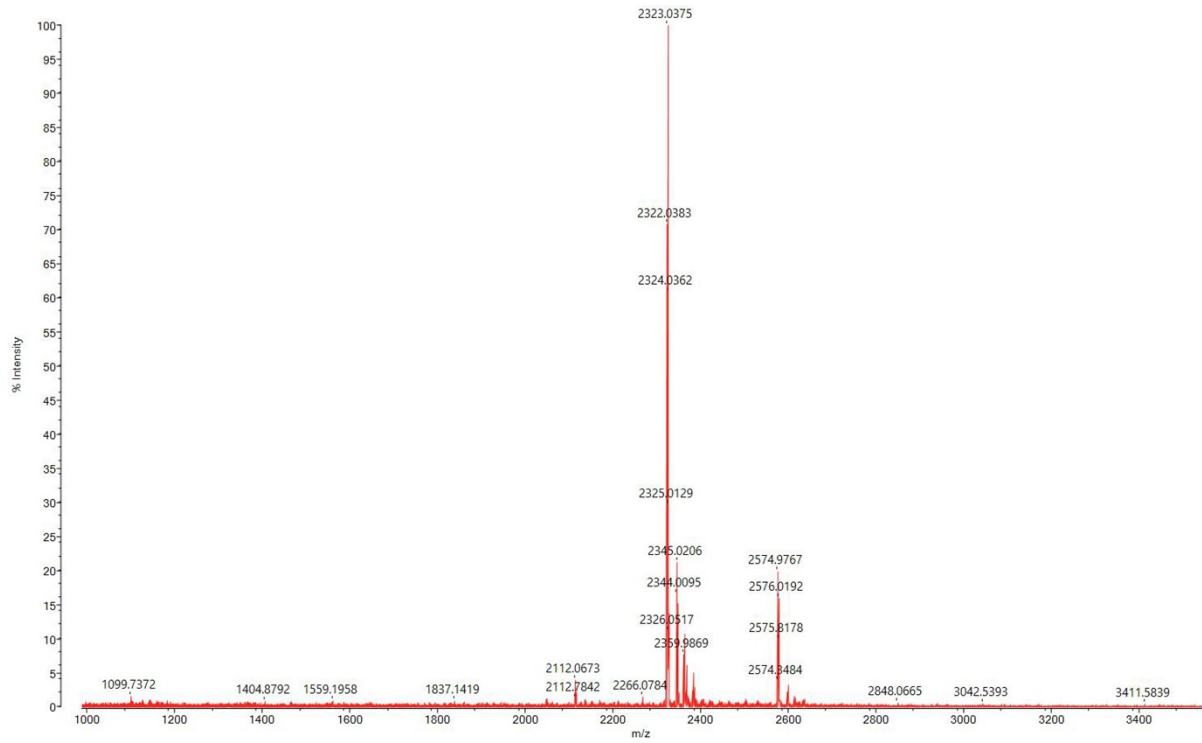

**Fig. S3** Mass spectrometry characterization of NC-1 with the sequence (GPO)<sub>3</sub>GFOGER(GPO)<sub>3</sub>.

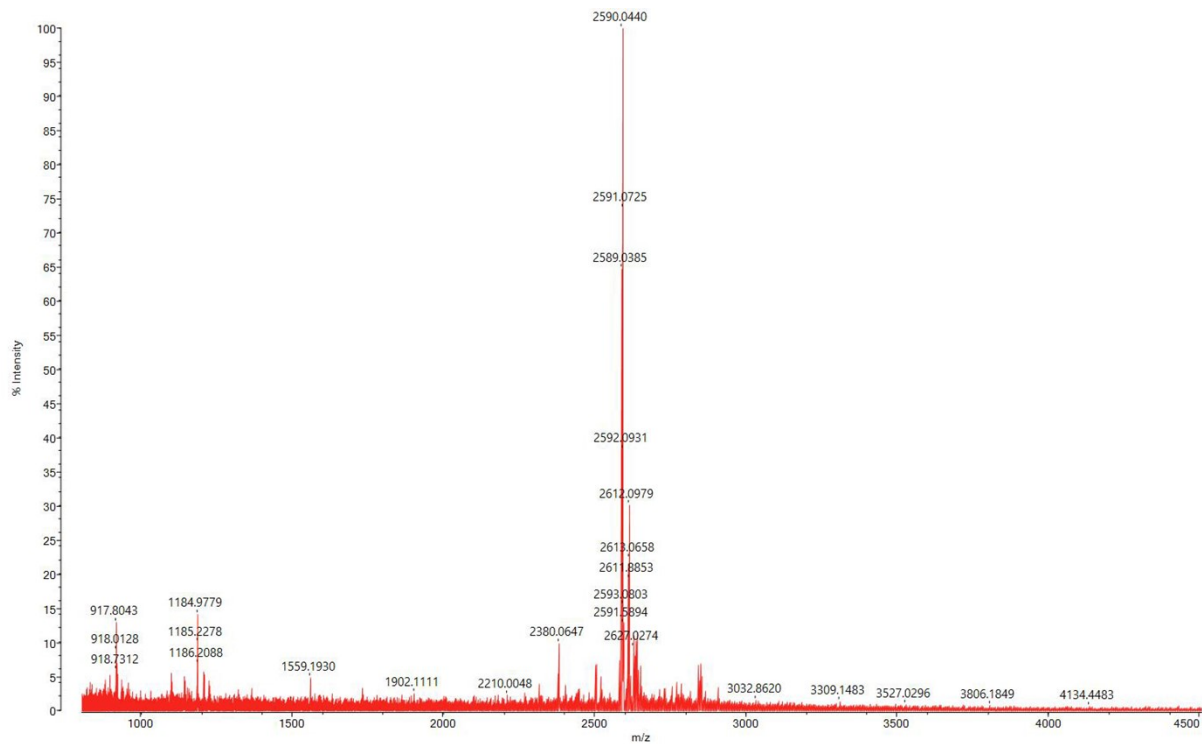

**Fig. S4** Mass spectrometry characterization of NC-2 with the sequence (GPO)<sub>3</sub>GFOGER(GPO)<sub>4</sub>.

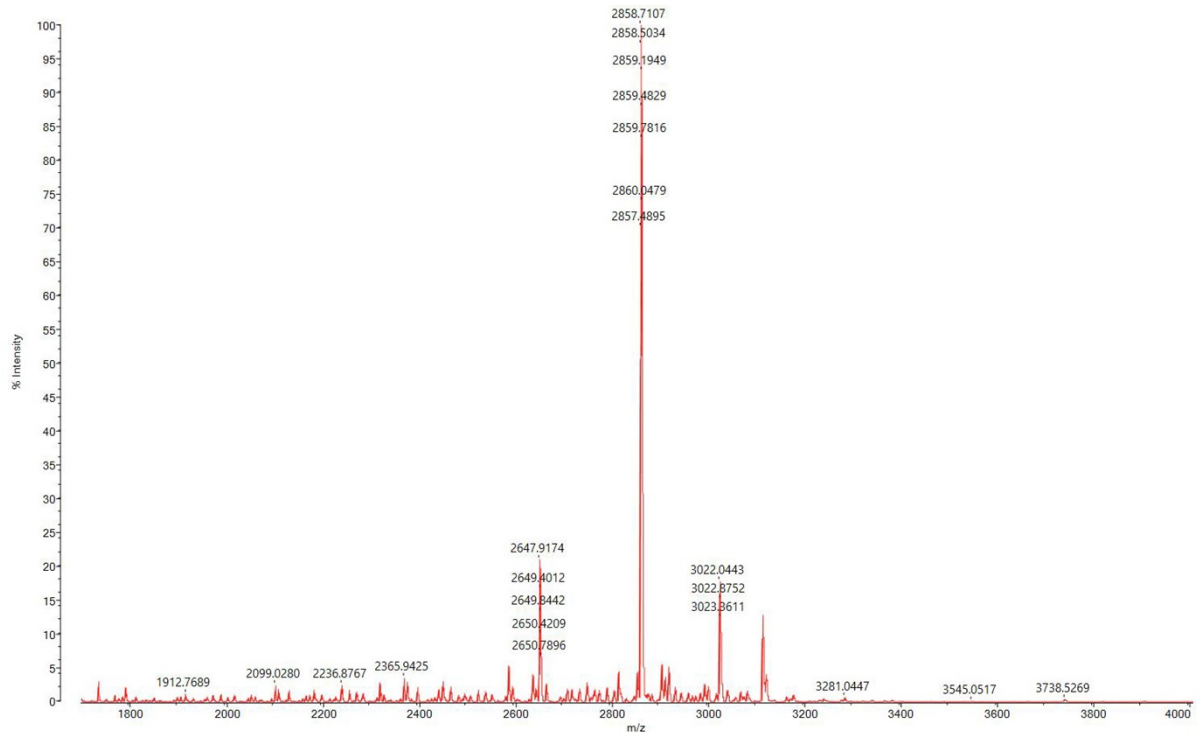

**Fig. S5** Mass spectrometry characterization of NC-3 with the sequence (GPO)<sub>4</sub>GFOGER(GPO)<sub>4</sub>.

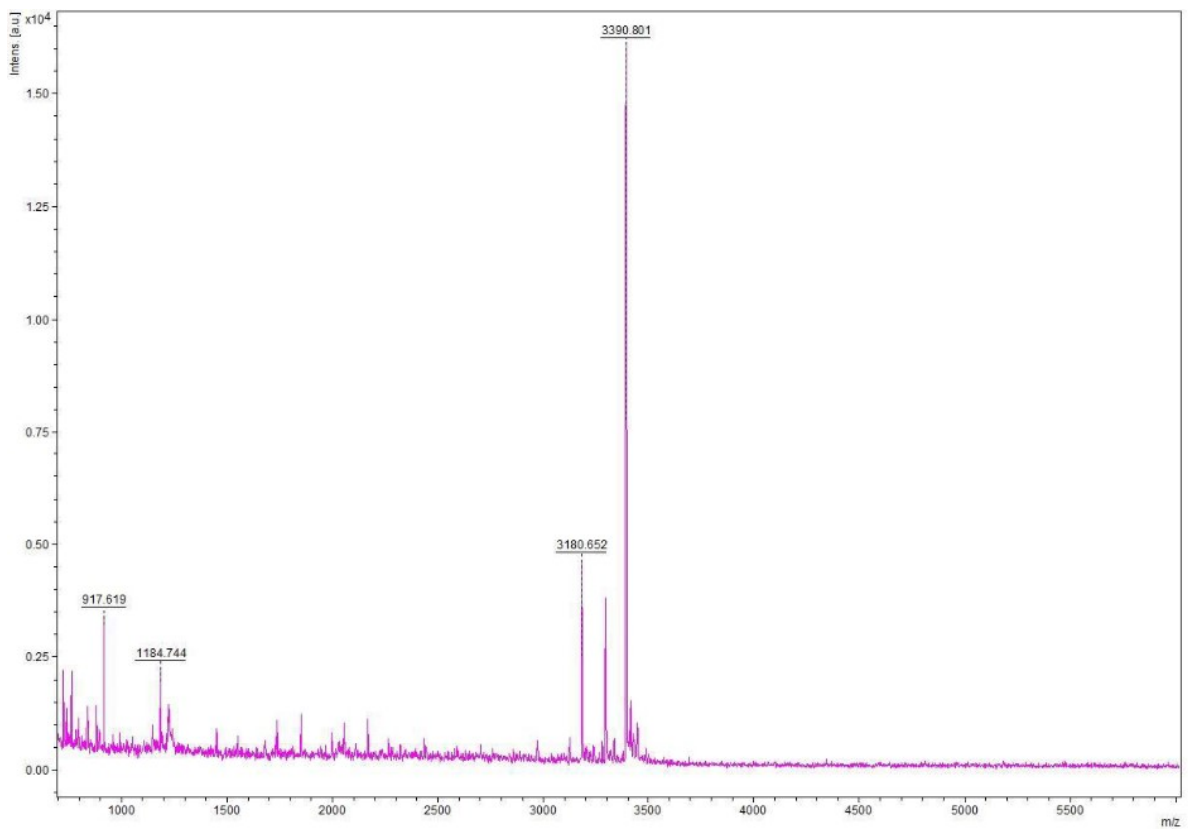

**Fig. S6** Mass spectrometry characterization of NC-4 with the sequence (GPO)<sub>5</sub>GFOGER(GPO)<sub>5</sub>.

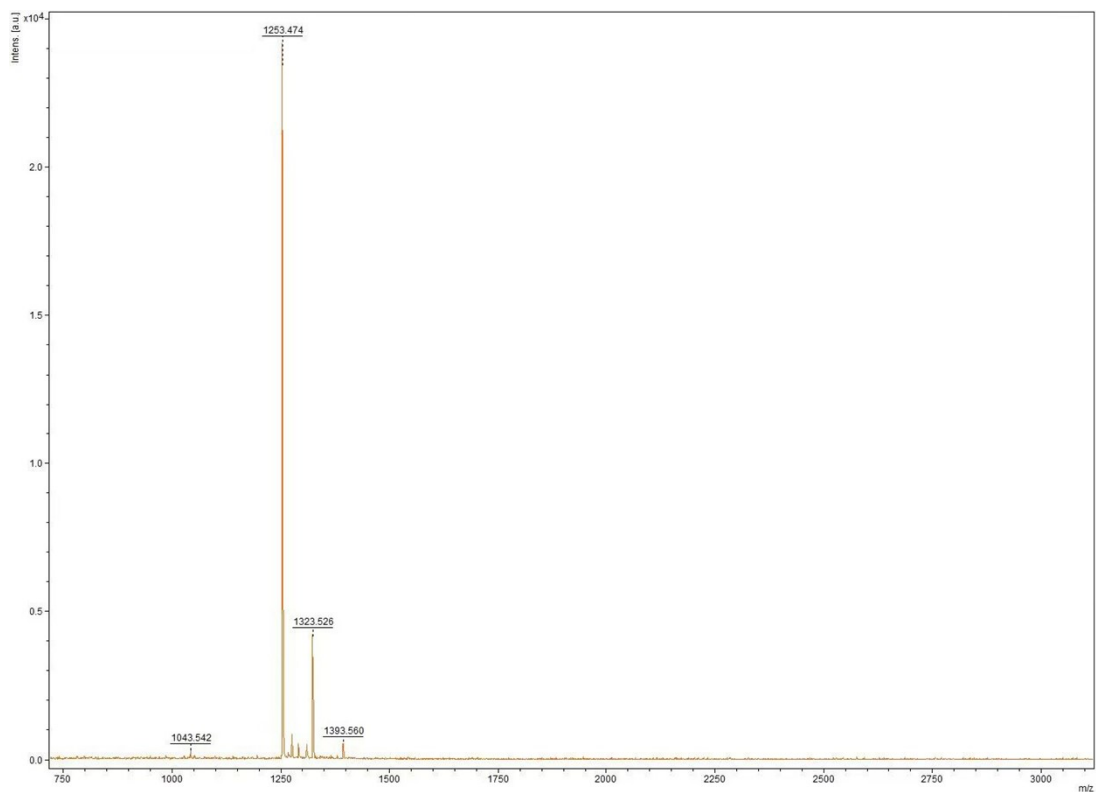

**Fig. S7** Mass spectrometry characterization of SMP with the sequence GPOGFOGERGPO.

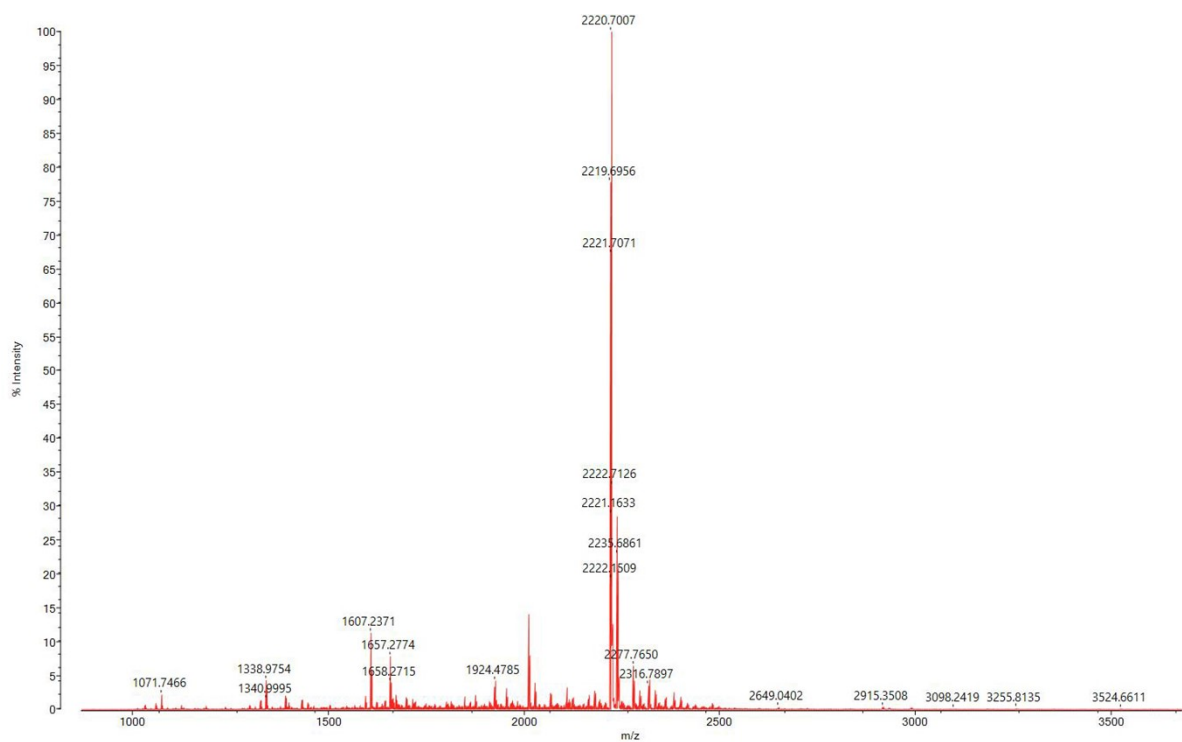

**Fig. S8** Mass spectrometry characterization of STP with the sequence (GPO)<sub>8</sub>.
